# Supplementary material for: Gas-phase deposition of di- and tetra-lithium salts of 2,5-dihydroxyterephthalic acid
Source: Royal Society of Chemistry journal article supplement (doi:10.1039/d2dt00055e), 2022-01-01
Supplement: d2dt00055e1.pdf [file d2dt00055e1.pdf]

## Gas-phase deposition of di- and tetra-lithium salts of 2,5-dihydroxyterephthalic acid

Supporting information

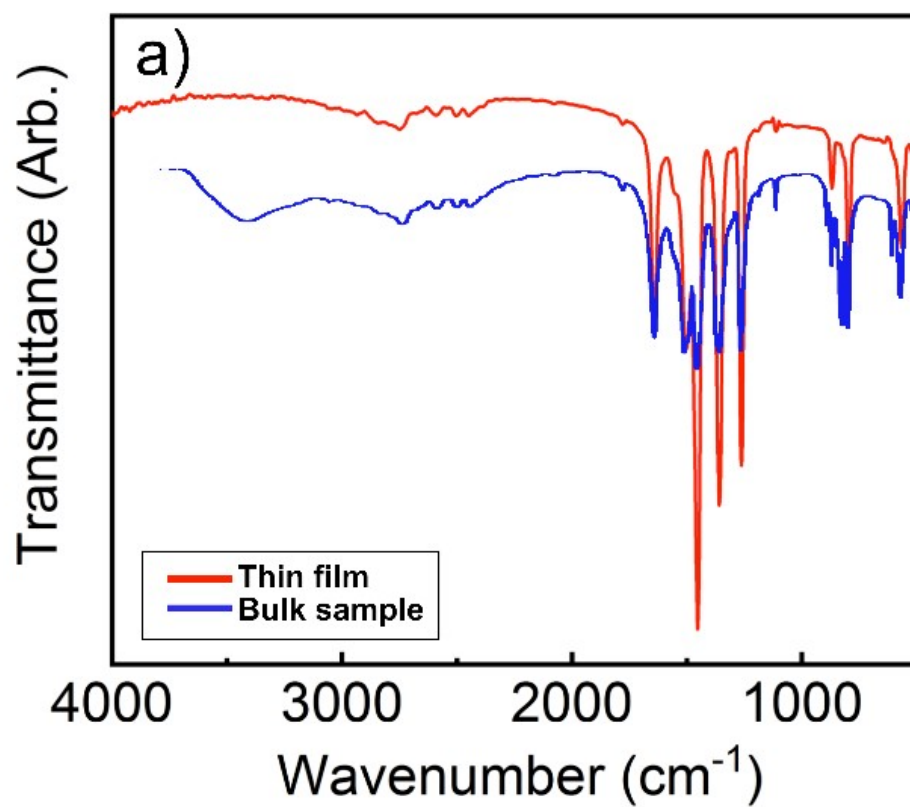

**Figure S1.** FTIR spectra for a  $\text{Li}_2\text{DHTP}$  film and a previously reported bulk sample<sup>1,2</sup> for comparison.

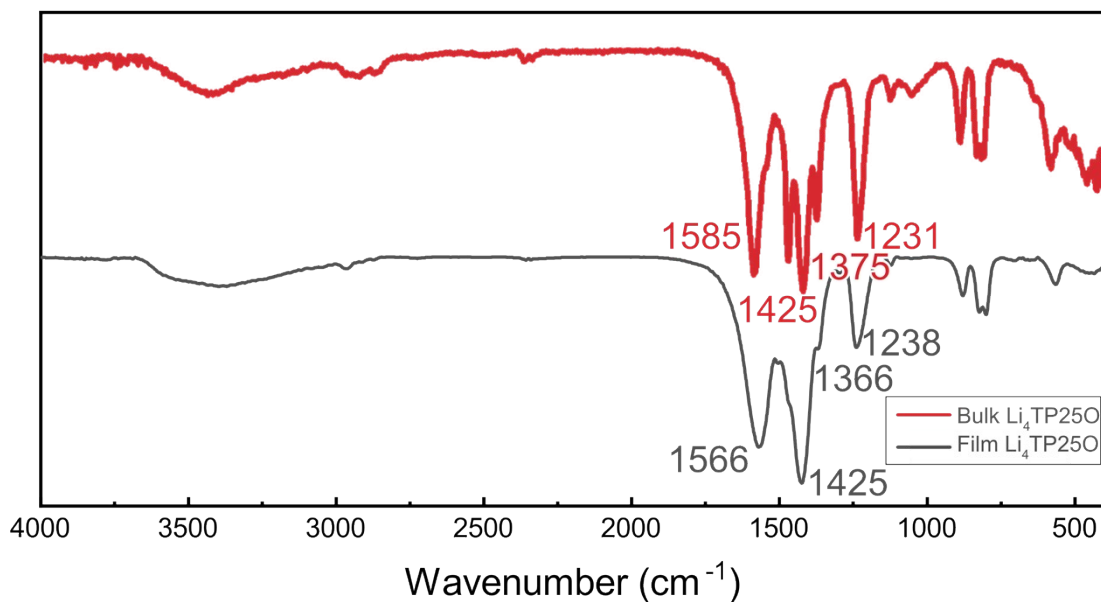

**Figure S2.** FTIR spectra for a  $\text{Li}_4\text{DHTP}$  film (grown with 64 s  $\text{Li}(\text{thd})$  pulses) and a previously reported bulk  $\text{Li}_4\text{DHTP}$  sample. The peak at  $1585\text{ cm}^{-1}$  is assigned to  $\nu_{\text{as}}$  of the carboxylate,  $1425\text{ cm}^{-1}$  to the benzene ring stretching modes,  $1375\text{ cm}^{-1}$  to  $\nu_{\text{s}}$  of the carboxylate and  $1231\text{ cm}^{-1}$  to O-Li of the alkoxide.<sup>3</sup>

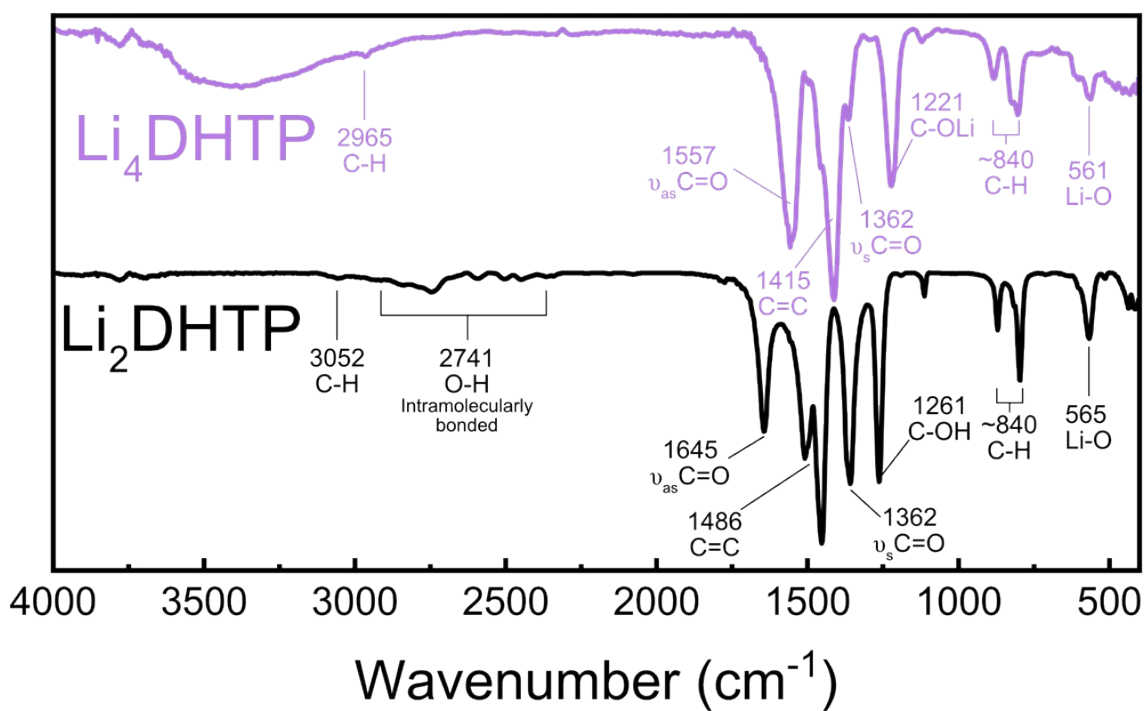

**Figure S3.** FTIR peak interpretations for  $\text{Li}_2\text{DHTP}$  (bottom) and  $\text{Li}_4\text{DHTP}$  (up).

**Table S1.** Thirteen example depositions with different combinations of pulse lengths. Many of these depositions were repeated multiple times in the laboratory. The last paragraph indicates whether the GIXRD pattern yielded any diffraction peaks.

| Deposition | Lithium pulse length (s) | Organic pulse length (s) | Crystalline (Yes/No) |
|------------|--------------------------|--------------------------|----------------------|
| 1          | 4                        | 15                       | Yes                  |
| 2          | 6                        | 15                       | Yes                  |
| 3          | 10                       | 15                       | Yes                  |
| 4          | 32                       | 10                       | No                   |
| 5          | 64                       | 10                       | No                   |
| 6          | 32                       | 32                       | Yes                  |
| 7          | 64                       | 64                       | Yes                  |
| 8          | 4                        | 64                       | Yes                  |
| 9          | 4                        | 32                       | Yes                  |
| 10         | 4                        | 10                       | Yes                  |
| 11         | 8                        | 10                       | No                   |
| 12         | 16                       | 10                       | No                   |
| 13         | 32                       | 10                       | No                   |

## References

- 1 S. Renault, V. A. Oltean, M. Ebadi, K. Edström and D. Brandell, *Solid State Ionics*, 2017, **307**, 1–5.
- 2 Q. Deng, J. Xue, W. Zou, L. Wang, A. Zhou and J. Li, *J. Electroanal. Chem.*, 2016, **761**, 74–79.
- 3 S. Renault, S. Gottis, A.-L. Barrès, M. Courty, O. Chauvet, F. Dolhem and P. Poizot, *Energy Environ. Sci.*, 2013, **6**, 2124.
